# Supplementary material for: A universal method for generating knockout mice in multiple genetic backgrounds using zygote electroporation
Source: PubMed Central journal article supplement (PMC10497038; doi:10.1242/bio.059970), 2023-09-06
Supplement: biolopen-12-059970-s1.pdf [file biolopen-12-059970-s1.pdf]

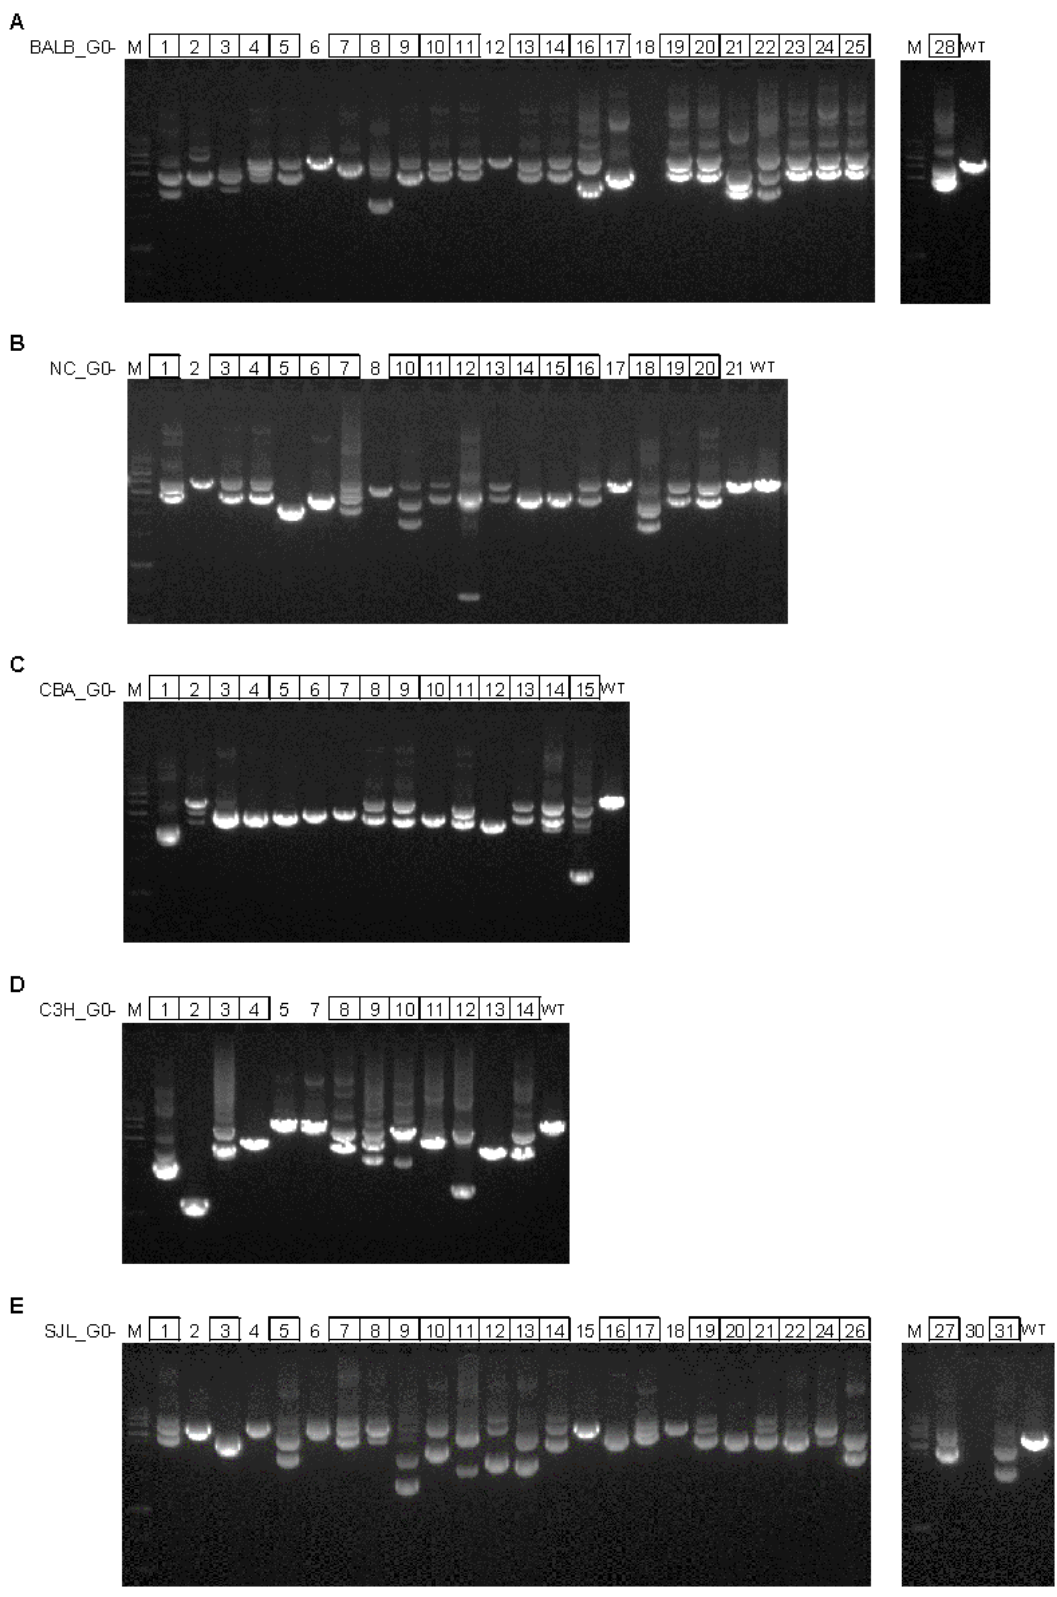

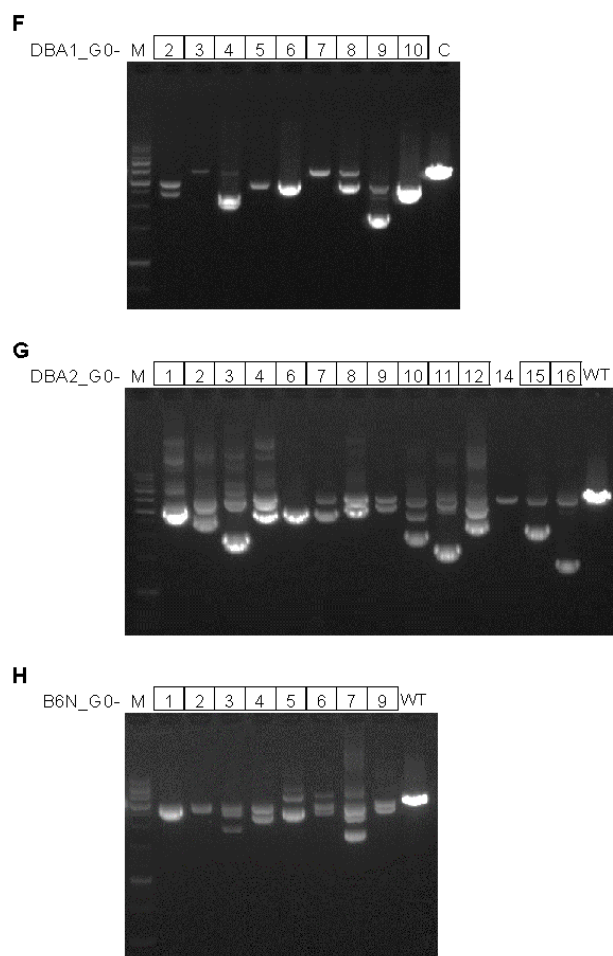

**Fig. S1. Electrophoresis results of long-PCR in G0 mice**

Numbers indicate mouse IDs, and black boxes indicate mice subjected to long-read analysis owing to the intended loss of target exons. WT represents wild-type mice of each inbred strain.

# NC

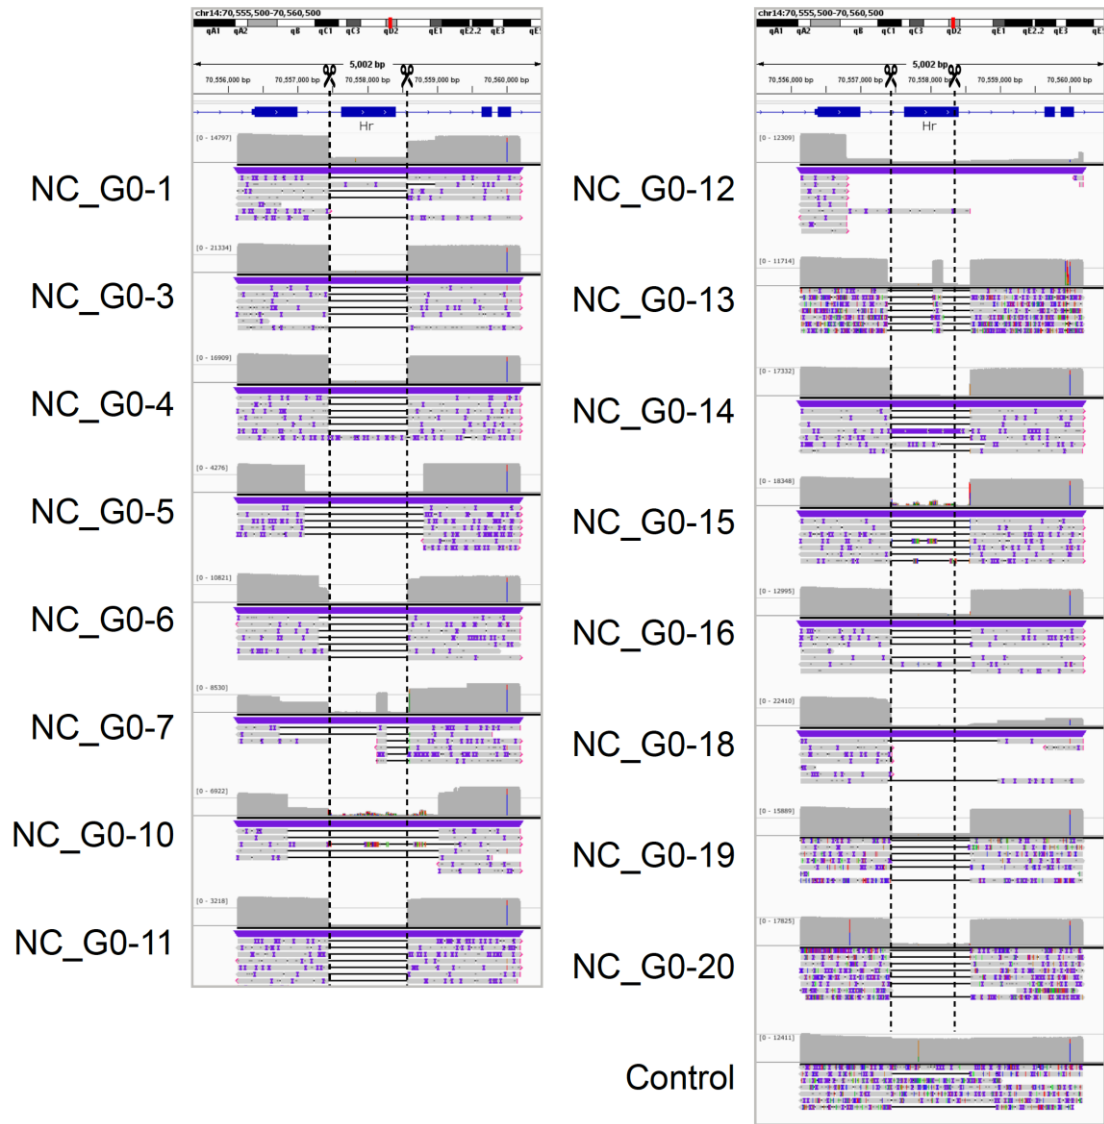

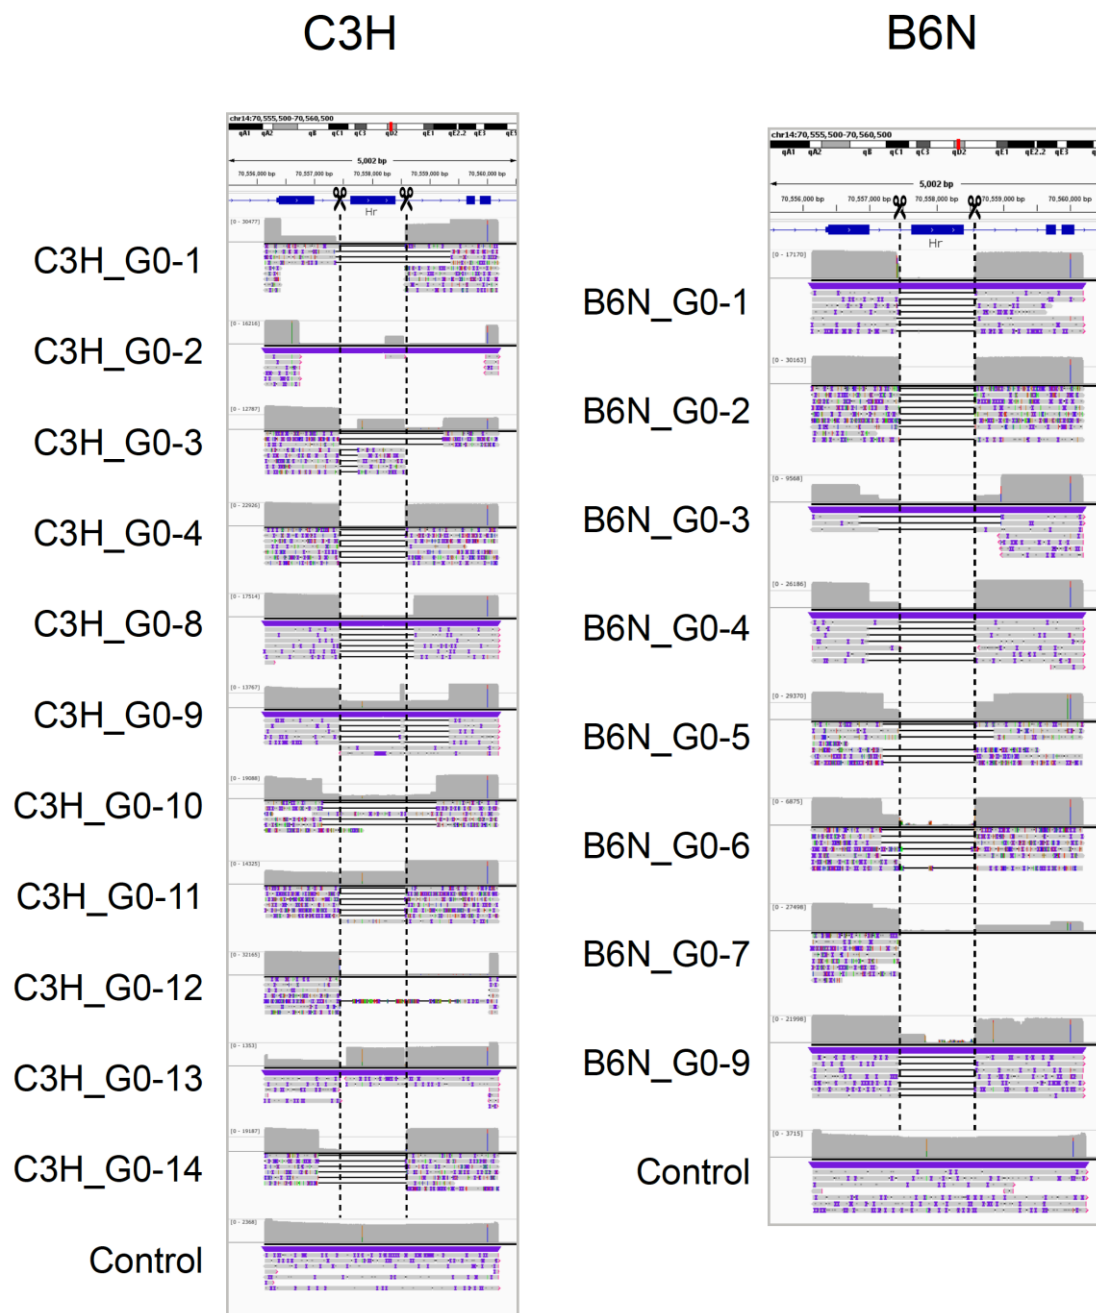

**Fig. S2. Visualisation of nanopore sequence reads of NC, C3H, and B6N at the *Hr* target locus.**

Visualisation of nanopore sequence reads at the *Hr* target locus in GRCm38.p6.

Scissors and dotted lines represent cleavage sites predicted by Cas9.

**Table S1. Survival and re-derivation rate of electroporated B6N zygotes in parallel experiments.**

| Strain | # of examined zygotes <sup>A</sup> | # of survived zygotes <sup>B</sup> (B/A) | # of embryos developed to two-cell stage <sup>C</sup> (C/B) | # of transferred two-cell embryos <sup>D</sup> | # of recipients <sup>E</sup> | # of pregnancy <sup>F</sup> (F/E) | # of newborns <sup>G</sup> (G/D) |
|--------|------------------------------------|------------------------------------------|-------------------------------------------------------------|------------------------------------------------|------------------------------|-----------------------------------|----------------------------------|
| B6N    | 186                                | 186 (100%)                               | 181 (97.3%)                                                 | 174                                            | 6                            | 6 (100.0%)                        | 61 (35.1%)                       |

#, number.

**Table S2. Details of the alleles in G1 mice.**

[Click here to download Table S2](#)

**Table S3. Age of female mice for super-ovulation and results of retired breeders.**

| Strain | Age of females   | # of examined females <sup>A</sup> | # of super-ovulated females <sup>B</sup> (B/A) | # of oocytes <sup>C</sup> | # of zygotes <sup>D</sup> (D/C) |
|--------|------------------|------------------------------------|------------------------------------------------|---------------------------|---------------------------------|
| BALB/c | 11wks            | 12                                 | 12 (100.0%)                                    | 204                       | 195 (95.6%)                     |
|        | Retired breeders | 15                                 | 12 (80.0%)                                     | 117                       | 115 (98.3%)                     |
| NC     | 9-10 wks         |                                    |                                                |                           |                                 |
| CBA    | 9-11 wks         |                                    |                                                |                           |                                 |
| C3H    | 11 wks           |                                    |                                                |                           |                                 |
| SJL    | 9 wks            |                                    |                                                |                           |                                 |
| DBA1   | 11wks            | 12                                 | 12 (100.0%)                                    | 268                       | 186 (69.4%)                     |
|        | Retired breeders | 12                                 | 11 (91.7%)                                     | 242                       | 242 (100.0%)                    |
| DBA2   | 9-10 wks         |                                    |                                                |                           |                                 |
| B6N    | 9-11 wks         |                                    |                                                |                           |                                 |

Age of retired females ranged from 8-weeks- to approximately 12-months-old. #, number.

**Table S4. Genomic DNA extraction methods in G0 mice.**

[Click here to download Table S4](#)

**Table S5. Primer sequences used for long-read and short-read sequencing.**

[Click here to download Table S5](#)
